# Supplementary material for: Artificial Bee Colony Optimization of NOx Emission and Reheat Steam Temperature in a 1000 MW Boiler
Source: Hindawi journal article supplement (doi:10.1155/2019/6287291), 2019-01-01
Supplement: f1 [file 6287291.f1.docx]

Appendix A

Experimental data are provided when boiler worked stably respectively at 650MW, 800MW and 850MW. More details refer to Table A1*−*Table A3.

**Table A1.** The steady-state experimental data of 650MW

| NO. | Inputs | | | | | | Outputs | |
| --- | --- | --- | --- | --- | --- | --- | --- | --- |
| thermal load C | thermal load D | thermal load E | thermal load F | αSOFA | running O2 (%) | NOx (mg/Nm3) | *Tr* (℃) |
| 1 | 145.5 | 153.8 | 162.9 | 191.7 | 0.2347 | 4.420 | 478.8 | 572.4 |
| 2 | 146.0 | 155.2 | 163.2 | 191.7 | 0.2280 | 4.578 | 498.5 | 573.6 |
| 3 | 146.1 | 154.9 | 163.4 | 191.8 | 0.2362 | 4.454 | 501.2 | 576.4 |
| 4 | 145.9 | 154.9 | 163.3 | 192.0 | 0.2269 | 4.546 | 508.9 | 572.2 |
| 5 | 146.3 | 155.4 | 163.7 | 191.8 | 0.2304 | 4.212 | 496.2 | 578.5 |
| 6 | 146.5 | 154.9 | 163.3 | 191.7 | 0.2169 | 4.080 | 478.7 | 577.4 |
| 7 | 146.2 | 155.6 | 164.0 | 192.3 | 0.2197 | 4.078 | 468.1 | 577.4 |
| 8 | 146.5 | 155.5 | 163.9 | 192.6 | 0.2091 | 3.962 | 483.9 | 577.4 |
| 9 | 146.2 | 155.4 | 163.8 | 192.5 | 0.2370 | 3.848 | 480.3 | 575.4 |
| 10 | 146.2 | 155.5 | 163.9 | 192.3 | 0.2174 | 4.033 | 486.8 | 576.9 |
| 11 | 146.6 | 155.5 | 163.8 | 192.1 | 0.2199 | 3.958 | 482.1 | 577.1 |
| 12 | 146.3 | 155.7 | 163.8 | 191.7 | 0.2226 | 3.851 | 475.2 | 577.4 |
| 13 | 134.6 | 159.9 | 168.0 | 195.9 | 0.2403 | 3.809 | 477.4 | 577.0 |
| 14 | 135.0 | 159.9 | 167.9 | 196.6 | 0.2632 | 3.905 | 462.1 | 576.3 |
| 15 | 134.7 | 159.5 | 167.3 | 194.6 | 0.2794 | 3.785 | 452.7 | 573.4 |
| 16 | 134.5 | 159.6 | 167.7 | 195.4 | 0.2724 | 3.918 | 432.7 | 574.7 |
| 17 | 134.8 | 159.4 | 167.6 | 196.1 | 0.2510 | 3.968 | 440.5 | 577.2 |
| 18 | 134.4 | 159.5 | 167.7 | 195.7 | 0.2587 | 3.935 | 431.1 | 574.3 |
| 19 | 134.6 | 159.8 | 167.7 | 195.6 | 0.2524 | 3.870 | 428.9 | 574.4 |
| 20 | 134.6 | 159.6 | 167.5 | 195.5 | 0.2704 | 3.989 | 431.8 | 577.7 |
| 21 | 134.5 | 159.9 | 168.2 | 196.2 | 0.2813 | 3.952 | 427.3 | 577.1 |
| 22 | 134.2 | 159.5 | 167.5 | 195.7 | 0.2735 | 3.910 | 420.9 | 573.2 |
| 23 | 134.3 | 159.9 | 167.6 | 196.1 | 0.2775 | 4.044 | 430.2 | 576.4 |
| 24 | 133.8 | 159.5 | 167.7 | 195.9 | 0.2511 | 4.019 | 431.8 | 577.9 |
| 25 | 133.2 | 171.6 | 150.3 | 210.0 | 0.2076 | 3.886 | 500.9 | 584.4 |
| 26 | 130.7 | 167.9 | 147.3 | 204.9 | 0.2234 | 4.303 | 530.1 | 583.3 |
| 27 | 131.0 | 167.8 | 147.1 | 203.8 | 0.1885 | 4.580 | 568.4 | 589.3 |
| 28 | 131.1 | 168.1 | 147.6 | 204.3 | 0.2160 | 4.479 | 570.7 | 587.2 |
| 29 | 130.9 | 168.1 | 147.4 | 204.3 | 0.2217 | 4.586 | 575.6 | 588.5 |
| 30 | 131.9 | 168.4 | 147.9 | 203.8 | 0.2012 | 4.559 | 568.4 | 586.7 |
| 31 | 131.2 | 168.9 | 148.2 | 205.4 | 0.2117 | 4.557 | 571.1 | 592.3 |
| 32 | 131.5 | 168.9 | 148.0 | 205.0 | 0.2293 | 4.565 | 570.7 | 590.3 |
| 33 | 131.4 | 168.9 | 148.0 | 205.1 | 0.2148 | 4.456 | 564.1 | 590.3 |
| 34 | 132.0 | 168.5 | 147.9 | 204.4 | 0.2307 | 4.610 | 579.2 | 590.0 |
| 35 | 131.8 | 168.3 | 147.9 | 204.0 | 0.2308 | 4.528 | 572.9 | 590.5 |
| 36 | 131.4 | 168.5 | 148.0 | 204.7 | 0.1895 | 4.637 | 582.6 | 592.3 |
| 37 | 131.7 | 168.0 | 148.2 | 203.9 | 0.2265 | 4.605 | 575.3 | 586.2 |
| 38 | 131.6 | 168.3 | 147.9 | 203.7 | 0.2434 | 4.597 | 577.0 | 582.8 |
| 39 | 131.8 | 168.1 | 147.8 | 204.0 | 0.2387 | 4.769 | 556.5 | 585.2 |
| 40 | 131.3 | 169.2 | 147.7 | 205.4 | 0.2470 | 4.712 | 555.9 | 586.7 |
| 41 | 131.5 | 167.6 | 147.9 | 204.4 | 0.2322 | 4.685 | 561.7 | 586.9 |
| 42 | 131.3 | 168.0 | 147.5 | 204.5 | 0.2310 | 4.731 | 553.0 | 583.3 |
| 43 | 131.7 | 168.9 | 147.9 | 204.6 | 0.2356 | 4.687 | 559.8 | 586.7 |
| 44 | 131.3 | 169.1 | 148.3 | 205.7 | 0.2359 | 4.759 | 560.5 | 584.0 |
| 45 | 130.9 | 168.5 | 147.6 | 205.1 | 0.2327 | 4.805 | 566.5 | 583.5 |
| 46 | 147.0 | 155.5 | 164.1 | 191.8 | 0.2268 | 4.635 | 510.6 | 575.4 |
| 47 | 146.4 | 155.2 | 163.7 | 191.5 | 0.2290 | 3.693 | 464.3 | 574.7 |
| 48 | 134.2 | 159.6 | 167.7 | 196.2 | 0.2576 | 3.853 | 439.7 | 576.9 |
| 49 | 137.3 | 161.6 | 170.1 | 197.7 | 0.2707 | 3.979 | 426.4 | 577.3 |
| 50 | 131.6 | 168.7 | 147.9 | 204.6 | 0.1979 | 4.445 | 564.6 | 588.3 |
| 51 | 131.7 | 168.6 | 147.6 | 204.6 | 0.2355 | 4.624 | 572.4 | 588.2 |
| 52 | 131.4 | 168.2 | 148.3 | 204.3 | 0.2217 | 4.740 | 559.0 | 585.7 |
| 53 | 131.4 | 168.7 | 147.9 | 204.8 | 0.2412 | 4.847 | 562.6 | 587.3 |

**Table A2.** The steady-state experimental data of 800MW

| NO. | Inputs | | | | | | | Outputs | |
| --- | --- | --- | --- | --- | --- | --- | --- | --- | --- |
| thermal load B | thermal load C | thermal load D | thermal load E | thermal load F | αSOFA | running O2 (%) | NOx (mg/Nm3) | *Tr* (℃) |
| 1 | 123.0 | 156.5 | 165.2 | 173.3 | 187.2 | 0.2214 | 3.951 | 464.0 | 584.0 |
| 2 | 123.1 | 156.8 | 165.5 | 173.0 | 187.6 | 0.2106 | 4.023 | 486.9 | 584.3 |
| 3 | 112.3 | 158.1 | 166.6 | 174.7 | 195.4 | 0.2183 | 3.767 | 455.6 | 587.6 |
| 4 | 109.0 | 157.6 | 166.3 | 174.9 | 203.1 | 0.2245 | 3.790 | 453.1 | 585.0 |
| 5 | 111.5 | 157.3 | 166.1 | 173.8 | 201.3 | 0.2166 | 3.567 | 450.2 | 583.3 |
| 6 | 110.6 | 156.7 | 165.3 | 173.1 | 200.2 | 0.2322 | 3.579 | 434.8 | 579.7 |
| 7 | 110.7 | 157.4 | 165.9 | 173.9 | 201.4 | 0.2527 | 3.401 | 426.2 | 583.0 |
| 8 | 109.8 | 156.8 | 166.2 | 173.9 | 201.4 | 0.2304 | 3.430 | 425.7 | 581.8 |
| 9 | 110.0 | 156.8 | 165.6 | 173.6 | 200.7 | 0.2483 | 3.441 | 432.3 | 582.1 |
| 10 | 110.0 | 156.4 | 165.0 | 173.0 | 200.6 | 0.2431 | 3.708 | 450.2 | 582.2 |
| 11 | 109.7 | 156.8 | 165.5 | 173.6 | 201.1 | 0.2385 | 3.594 | 436.0 | 582.1 |
| 12 | 109.9 | 156.9 | 166.1 | 173.9 | 202.0 | 0.2529 | 3.525 | 416.0 | 582.6 |
| 13 | 109.4 | 156.9 | 165.7 | 174.0 | 202.5 | 0.2383 | 3.485 | 424.8 | 581.3 |
| 14 | 109.1 | 156.5 | 165.6 | 173.7 | 201.9 | 0.2420 | 3.296 | 413.4 | 581.1 |
| 15 | 108.5 | 156.7 | 165.2 | 173.8 | 202.7 | 0.2534 | 3.130 | 404.4 | 579.1 |
| 16 | 108.0 | 156.6 | 165.4 | 173.6 | 202.0 | 0.2370 | 3.573 | 444.0 | 579.1 |
| 17 | 108.1 | 155.9 | 164.8 | 173.1 | 201.4 | 0.2210 | 3.558 | 449.7 | 579.5 |
| 28 | 108.4 | 156.1 | 164.4 | 172.9 | 201.0 | 0.1963 | 3.222 | 427.0 | 585.3 |
| 19 | 109.4 | 155.7 | 164.6 | 172.3 | 200.2 | 0.2299 | 3.439 | 440.0 | 588.4 |
| 20 | 109.0 | 156.5 | 165.1 | 173.4 | 201.5 | 0.2097 | 3.525 | 462.5 | 590.3 |
| 21 | 108.9 | 156.4 | 165.6 | 173.7 | 202.3 | 0.2136 | 3.676 | 471.1 | 591.1 |
| 22 | 108.3 | 156.8 | 165.8 | 173.8 | 202.9 | 0.2251 | 3.531 | 472.9 | 590.6 |
| 23 | 108.5 | 156.8 | 165.5 | 173.8 | 202.4 | 0.2149 | 3.617 | 475.7 | 591.4 |
| 24 | 108.2 | 156.1 | 165.4 | 174.1 | 202.7 | 0.2079 | 3.539 | 471.6 | 590.9 |
| 25 | 108.0 | 156.4 | 165.9 | 174.3 | 202.2 | 0.2095 | 3.617 | 485.3 | 592.7 |
| 26 | 108.1 | 156.3 | 165.6 | 174.0 | 203.0 | 0.1998 | 3.609 | 490.6 | 591.3 |
| 27 | 108.5 | 156.6 | 165.6 | 173.8 | 202.1 | 0.2164 | 3.552 | 481.0 | 591.8 |
| 28 | 107.6 | 156.4 | 165.3 | 173.8 | 202.5 | 0.2203 | 3.661 | 488.2 | 588.4 |
| 29 | 108.0 | 156.5 | 165.9 | 174.2 | 203.4 | 0.1973 | 3.518 | 480.2 | 592.9 |
| 30 | 108.8 | 156.4 | 165.4 | 173.7 | 202.7 | 0.2044 | 3.708 | 495.6 | 591.6 |
| 31 | 110.7 | 157.0 | 165.6 | 173.6 | 200.7 | 0.2445 | 3.376 | 421.8 | 581.8 |
| 32 | 110.3 | 156.7 | 165.3 | 173.2 | 200.7 | 0.2331 | 3.245 | 416.3 | 579.8 |
| 33 | 109.9 | 157.0 | 165.3 | 173.3 | 200.7 | 0.2517 | 3.447 | 436.2 | 580.5 |
| 34 | 108.8 | 156.2 | 165.5 | 173.8 | 202.8 | 0.1970 | 3.493 | 464.4 | 590.0 |
| 35 | 108.5 | 156.4 | 165.8 | 174.1 | 202.7 | 0.2074 | 3.609 | 473.3 | 591.1 |
| 36 | 107.6 | 156.2 | 165.7 | 174.0 | 202.3 | 0.2164 | 3.613 | 481.2 | 592.4 |

**Table A3.** The steady-state experimental data of 850MW

| NO. | Inputs | | | | | | Outputs | |
| --- | --- | --- | --- | --- | --- | --- | --- | --- |
| thermal load C | thermal load D | thermal load E | thermal load F | αSOFA | running O2 (%) | NOx (mg/Nm3) | *Tr* (℃) |
| 1 | 156.2 | 169.0 | 191.1 | 203.8 | 0.2146 | 3.493 | 490.2 | 596.0 |
| 2 | 156.0 | 169.3 | 191.6 | 203.9 | 0.1842 | 3.668 | 494.9 | 596.0 |
| 3 | 157.0 | 170.1 | 192.1 | 204.7 | 0.2065 | 3.437 | 477.0 | 595.7 |
| 4 | 157.3 | 169.9 | 191.3 | 203.9 | 0.2118 | 3.310 | 470.9 | 594.6 |
| 5 | 156.0 | 168.8 | 190.0 | 202.1 | 0.2005 | 3.506 | 483.5 | 595.1 |
| 6 | 155.3 | 167.9 | 189.4 | 202.0 | 0.2090 | 3.624 | 490.9 | 595.1 |
| 7 | 154.9 | 168.2 | 189.8 | 202.6 | 0.2127 | 3.664 | 494.1 | 595.9 |
| 8 | 155.3 | 167.9 | 189.9 | 202.6 | 0.2226 | 3.819 | 489.6 | 594.9 |
| 9 | 154.7 | 167.6 | 189.4 | 202.5 | 0.2080 | 3.756 | 476.5 | 595.1 |
| 10 | 154.4 | 167.6 | 189.5 | 201.4 | 0.2086 | 3.659 | 478.9 | 594.4 |
| 11 | 154.5 | 167.0 | 189.5 | 202.2 | 0.2148 | 3.588 | 464.2 | 595.1 |
| 12 | 152.8 | 166.0 | 188.1 | 201.1 | 0.2081 | 3.603 | 462.2 | 592.9 |
| 13 | 154.4 | 167.2 | 188.9 | 200.5 | 0.2196 | 3.407 | 445.7 | 593.3 |
| 14 | 154.3 | 167.1 | 188.5 | 200.5 | 0.2031 | 3.682 | 462.4 | 594.4 |
| 15 | 154.2 | 166.6 | 188.5 | 201.1 | 0.2094 | 3.773 | 474.0 | 595.1 |
| 16 | 153.9 | 166.8 | 188.6 | 201.0 | 0.2123 | 3.792 | 466.2 | 596.4 |
| 17 | 154.6 | 166.9 | 188.9 | 201.3 | 0.2079 | 3.647 | 449.4 | 595.2 |
| 18 | 154.1 | 166.8 | 188.2 | 200.8 | 0.2101 | 3.584 | 450.2 | 596.4 |
| 19 | 155.6 | 168.3 | 190.5 | 203.1 | 0.2015 | 3.943 | 459.8 | 598.3 |
| 20 | 154.4 | 167.6 | 189.7 | 201.8 | 0.2051 | 3.689 | 448.7 | 596.0 |
| 21 | 153.4 | 166.5 | 188.3 | 201.2 | 0.2158 | 3.418 | 436.0 | 593.9 |
| 22 | 153.3 | 166.8 | 188.2 | 200.5 | 0.2217 | 3.666 | 455.0 | 594.2 |
| 23 | 153.4 | 166.1 | 188.0 | 200.6 | 0.1984 | 3.901 | 469.2 | 595.5 |
| 24 | 153.4 | 166.6 | 188.6 | 200.5 | 0.2147 | 3.830 | 468.1 | 592.6 |
| 25 | 154.3 | 167.3 | 188.9 | 201.0 | 0.2024 | 3.931 | 468.4 | 591.7 |
| 26 | 153.1 | 166.1 | 188.6 | 200.8 | 0.2147 | 3.724 | 450.7 | 590.2 |
| 27 | 153.3 | 166.4 | 188.6 | 201.5 | 0.2155 | 3.718 | 455.9 | 587.9 |
| 28 | 151.1 | 164.4 | 186.3 | 199.3 | 0.2101 | 3.601 | 442.1 | 584.8 |
| 29 | 194.9 | 194.2 | 215.9 | 228.7 | 0.2351 | 3.600 | 387.7 | 588.3 |
| 30 | 196.8 | 196.2 | 219.1 | 231.8 | 0.2512 | 3.369 | 390.9 | 589.8 |
| 31 | 201.9 | 200.5 | 209.3 | 238.0 | 0.2266 | 3.678 | 415.5 | 589.8 |
| 32 | 201.5 | 216.4 | 193.7 | 237.9 | 0.2055 | 2.802 | 370.2 | 585.8 |
| 33 | 200.3 | 214.7 | 192.5 | 235.9 | 0.2132 | 2.171 | 342.7 | 592.6 |
| 34 | 200.5 | 214.7 | 193.0 | 235.2 | 0.2108 | 2.745 | 394.5 | 592.5 |
| 35 | 200.0 | 214.0 | 192.7 | 235.0 | 0.2209 | 3.231 | 435.4 | 595.7 |
| 36 | 200.5 | 214.8 | 192.7 | 235.5 | 0.2081 | 3.498 | 474.9 | 597.9 |
| 37 | 200.9 | 214.7 | 193.6 | 234.9 | 0.1931 | 4.042 | 521.8 | 597.5 |
| 38 | 201.4 | 215.7 | 193.6 | 237.6 | 0.2225 | 4.000 | 518.4 | 603.3 |
| 39 | 201.2 | 215.4 | 193.6 | 237.1 | 0.2060 | 4.479 | 581.4 | 599.3 |
| 40 | 200.7 | 215.7 | 193.5 | 236.9 | 0.2247 | 3.863 | 514.6 | 601.7 |
| 41 | 203.1 | 217.4 | 195.4 | 238.7 | 0.2049 | 3.609 | 467.0 | 594.7 |
| 42 | 202.6 | 217.2 | 195.2 | 238.4 | 0.2123 | 3.827 | 480.1 | 591.4 |
| 43 | 202.4 | 216.7 | 195.0 | 237.9 | 0.2185 | 3.729 | 475.2 | 592.1 |
| 44 | 202.8 | 216.9 | 195.1 | 237.7 | 0.2172 | 4.115 | 494.3 | 594.9 |
| 45 | 203.0 | 217.9 | 196.0 | 239.0 | 0.2184 | 4.000 | 497.5 | 593.8 |
| 46 | 203.2 | 217.4 | 195.8 | 237.7 | 0.2305 | 3.914 | 488.8 | 595.1 |
| 47 | 203.9 | 218.2 | 196.1 | 238.8 | 0.2252 | 3.945 | 489.0 | 595.6 |
| 48 | 203.5 | 217.3 | 196.0 | 238.3 | 0.2095 | 3.912 | 489.1 | 594.0 |
| 49 | 203.4 | 217.7 | 195.7 | 239.1 | 0.2203 | 3.951 | 491.1 | 593.0 |
| 50 | 203.1 | 217.1 | 195.9 | 238.2 | 0.2221 | 3.996 | 495.0 | 595.0 |
| 51 | 203.2 | 217.7 | 195.7 | 238.8 | 0.2131 | 3.994 | 495.9 | 594.8 |
| 52 | 203.6 | 217.2 | 195.8 | 238.1 | 0.2296 | 3.966 | 494.3 | 595.4 |
| 53 | 203.6 | 217.3 | 196.1 | 238.3 | 0.2284 | 4.059 | 498.4 | 594.8 |
| 54 | 203.1 | 217.0 | 195.7 | 237.8 | 0.2259 | 3.951 | 493.0 | 594.6 |
| 55 | 203.3 | 217.9 | 196.1 | 238.1 | 0.2262 | 4.141 | 500.3 | 595.1 |
| 56 | 203.9 | 217.4 | 196.2 | 238.1 | 0.2093 | 4.292 | 506.8 | 596.4 |
| 57 | 203.4 | 218.2 | 195.8 | 237.7 | 0.2239 | 4.200 | 495.6 | 595.3 |
| 58 | 203.5 | 217.4 | 195.9 | 238.0 | 0.2198 | 4.261 | 500.0 | 595.7 |
| 59 | 203.6 | 217.4 | 195.9 | 237.7 | 0.2173 | 4.336 | 497.2 | 595.4 |
| 60 | 203.5 | 217.2 | 196.1 | 237.6 | 0.2248 | 4.313 | 496.9 | 595.0 |
| 61 | 203.9 | 217.7 | 195.9 | 238.2 | 0.2249 | 4.361 | 500.3 | 597.3 |
| 62 | 203.7 | 217.8 | 196.1 | 238.4 | 0.2335 | 4.317 | 489.7 | 597.0 |
| 63 | 203.7 | 217.3 | 195.8 | 237.4 | 0.1981 | 3.987 | 472.9 | 595.0 |
| 64 | 201.6 | 214.5 | 194.1 | 245.3 | 0.2309 | 4.034 | 472.8 | 597.3 |
| 65 | 201.4 | 215.4 | 193.7 | 243.7 | 0.2247 | 3.971 | 467.3 | 597.0 |
| 66 | 202.0 | 215.2 | 194.4 | 242.2 | 0.2242 | 4.059 | 480.8 | 598.9 |
| 67 | 201.7 | 215.7 | 195.3 | 241.2 | 0.2206 | 4.088 | 474.0 | 597.3 |
| 68 | 202.2 | 216.5 | 195.3 | 239.3 | 0.2015 | 4.065 | 479.0 | 598.4 |
| 69 | 202.3 | 216.3 | 195.3 | 240.8 | 0.2343 | 4.282 | 489.6 | 598.6 |
| 70 | 202.2 | 216.7 | 195.5 | 240.9 | 0.2155 | 3.945 | 462.9 | 598.6 |
| 71 | 202.2 | 216.6 | 195.3 | 243.1 | 0.2182 | 3.964 | 458.3 | 599.9 |
| 72 | 201.8 | 216.0 | 194.9 | 241.9 | 0.2160 | 4.090 | 466.1 | 598.3 |
| 73 | 200.9 | 215.6 | 194.0 | 245.6 | 0.2223 | 3.863 | 450.5 | 597.9 |
| 74 | 200.8 | 215.0 | 193.6 | 247.1 | 0.2067 | 3.809 | 441.4 | 596.6 |
| 75 | 202.9 | 217.5 | 195.9 | 244.1 | 0.2158 | 3.798 | 450.3 | 595.8 |
| 76 | 202.7 | 217.4 | 195.1 | 242.8 | 0.2321 | 3.716 | 447.9 | 593.5 |
| 77 | 184.9 | 227.0 | 205.3 | 240.4 | 0.2345 | 3.729 | 444.8 | 594.1 |
| 78 | 186.7 | 228.8 | 207.1 | 242.0 | 0.2129 | 4.006 | 447.1 | 594.6 |
| 79 | 185.8 | 228.6 | 207.3 | 243.7 | 0.2164 | 3.779 | 434.2 | 596.1 |
| 80 | 185.3 | 228.9 | 207.5 | 243.3 | 0.2331 | 3.842 | 431.1 | 595.6 |
| 81 | 185.5 | 228.5 | 206.9 | 243.8 | 0.2215 | 3.725 | 423.2 | 593.6 |
| 82 | 185.4 | 228.6 | 206.7 | 242.0 | 0.2253 | 3.569 | 423.9 | 593.9 |
| 83 | 185.2 | 228.4 | 206.7 | 244.0 | 0.2099 | 3.785 | 433.6 | 593.8 |
| 84 | 186.1 | 229.1 | 207.3 | 242.2 | 0.2239 | 3.790 | 431.0 | 592.6 |
| 85 | 185.2 | 227.9 | 205.9 | 244.9 | 0.2214 | 3.790 | 427.9 | 593.9 |
| 86 | 184.4 | 227.8 | 206.5 | 249.8 | 0.2127 | 3.943 | 426.1 | 595.3 |
| 87 | 183.4 | 227.3 | 205.1 | 251.3 | 0.2242 | 3.600 | 403.7 | 594.2 |
| 88 | 183.6 | 227.5 | 205.7 | 247.3 | 0.2339 | 3.489 | 406.1 | 591.3 |
| 89 | 183.4 | 227.4 | 204.8 | 248.0 | 0.2213 | 3.853 | 434.8 | 592.7 |
| 90 | 184.1 | 226.5 | 205.1 | 248.3 | 0.2363 | 3.899 | 436.1 | 593.8 |
| 91 | 155.2 | 167.6 | 189.4 | 201.9 | 0.2123 | 3.642 | 476.5 | 595.9 |
| 92 | 203.0 | 217.6 | 195.6 | 238.5 | 0.2051 | 3.823 | 486.2 | 594.1 |
| 93 | 203.4 | 217.6 | 196.2 | 238.3 | 0.2229 | 4.156 | 496.4 | 595.1 |
| 94 | 201.5 | 215.3 | 194.2 | 245.0 | 0.2240 | 4.176 | 480.1 | 597.9 |
| 95 | 184.5 | 228.5 | 206.5 | 246.8 | 0.2186 | 3.643 | 423.3 | 596.0 |
| 96 | 183.7 | 226.9 | 205.2 | 246.0 | 0.2271 | 3.533 | 415.9 | 592.0 |

Appendix B

Table B1. Lower and upper bounds of inputs of rdCV-MO-NPLS model at 650MW

|  | thermal load C (*X*1) | thermal load D (*X*2) | thermal load E (*X*3) | thermal load F (*X*4) | αSOFA (*X*5) | runningO2  (*X*6) |
| --- | --- | --- | --- | --- | --- | --- |
| *X*min | 130.7 | 153.8 | 147.1 | 191.7 | 0.1884 | 3.785 |
| *X*max | 146.6 | 171.6 | 168.2 | 210.0 | 0.2813 | 4.805 |

Table B2. Lower and upper bounds of inputs of rdCV-MO-NPLS model at 800MW

|  | thermal load B (*X*1) | thermal load C (*X*2) | thermal load D (*X*3) | thermal load E (*X*4) | thermal load F (*X*5) | αSOFA (*X*6) | running O2  (*X*7) |
| --- | --- | --- | --- | --- | --- | --- | --- |
| *X*min | 107.6 | 155.9 | 164.4 | 172.9 | 187.2 | 0.1963 | 1.566 |
| *X*max | 123.9 | 158.1 | 166.6 | 174.7 | 203.4 | 0.2534 | 2.237 |

Table B3. Lower and upper bounds of inputs of rdCV-MO-NPLS model at 850MW

|  | thermal load C (*X*1) | thermal load D (*X*2) | thermal load E (*X*3) | thermal load F (*X*4) | αSOFA (*X*5) | runningO2  (*X*6) |
| --- | --- | --- | --- | --- | --- | --- |
| *X*min | 151.1 | 164.4 | 186.3 | 199.3 | 0.1842 | 2.171 |
| *X*max | 203.9 | 229.1 | 219.1 | 251.3 | 0.2512 | 4.479 |
